# Supplementary material for: An analysis of structural relationship among achievement motive on social participation, purpose in life, and role expectations among community dwelling elderly attending day services
Source: PeerJ. 2016 Jan 28;4:e1655. doi: 10.7717/peerj.1655 (PMC4734058; doi:10.7717/peerj.1655)
Supplement: Supplemental Information 1 [file peerj-04-1655-s001.xlsx]

## Sheet: 研究2　HAD用(データ修正)役割詳細
No.	male	female	age	disease	care level	housemate	spouse	grandchildren	economic condition	total number of roles	volunteer	care giver	house work	friend	family member	religionist	hobbyist	organization	student	worker	other	going out	hobby	K-1 item1	K-1 item2	K-1 item3	K-1 item4	K-1 item5	K-1 item6	K-1 item7	K-1 item8	K-1 item9	K-1 item10	K-1 item11	K-1 item12	K-1 item13	K-1 item14	K-1 item15	K-1 item16	Realize	Fulfill	Will	Exist	K-1 total score	SAMR item1	SAMR item2	SAMR item3	SAMR item4	SAMR item5
101	0	1	75	4	5	2	0	0	2	1	0	0	0	0	1	0	0	0	0	0	0	3	1	2	1	0	0	0	0	2	2	1	0	0	2	0	0	0	0	2	6	0	2	10	3	5	6	3	5
102	0	1	75	1	5	3	1	0	1	1	0	0	0	0	1	0	0	0	0	0	0	3	0	2	1	2	2	2	2	2	2	2	2	2	0	2	1	2	0	11	7	4	4	26	5	5	4	5	6
103	1	0	85	4	3	5	1	1	1	1	0	0	0	0	1	0	0	0	0	0	0	4	0	0	0	2	0	2	0	2	0	0	0	0	2	2	1	0	0	5	2	2	2	11	2	3	4	2	5
104	1	0	76	2	4	1	1	0	3	0	0	0	0	0	0	0	0	0	0	0	0	3	1	0	0	0	2	0	0	0	1	2	0	2	2	2	0	0	1	0	7	4	1	12	3	2	2	2	2
105	1	0	71	1	.	1	1	0	3	1	0	0	0	0	1	0	0	0	0	0	0	2	0	0	0	0	0	0	0	0	0	0	0	0	2	0	0	0	0	0	2	0	0	2	1	1	1	1	1
106	0	1	49	2	5	4	1	0	3	1	0	0	0	0	1	0	0	0	0	0	0	5	1	0	0	2	0	2	0	2	0	0	1	0	0	2	0	0	2	4	0	2	5	11	1	1	1	1	1
107	0	1	64	2	5	1	1	0	1	2	0	0	1	0	1	0	0	0	0	0	0	3	2	2	2	2	0	2	2	1	1	1	2	2	1	1	2	2	1	12	5	3	4	24	6	6	5	6	6
108	1	0	83	1	4	6	1	0	1	1	0	0	0	0	1	0	0	0	0	0	0	6	1	0	0	1	0	2	1	2	1	1	2	2	2	2	2	2	2	8	4	4	6	22	6	7	7	7	7
109	0	1	77	1	4	1	1	0	1	1	0	0	0	0	1	0	0	0	0	0	0	4	0	2	0	2	1	2	2	2	1	0	0	0	2	2	0	0	2	8	4	2	4	18	6	5	7	3	7
110	0	1	81	1	5	1	0	0	1	1	0	0	0	0	1	0	0	0	0	0	0	5	1	2	2	2	2	2	0	1	2	2	1	2	2	2	0	0	0	6	10	4	2	22	6	4	5	2	7
111	0	1	79	1	5	0	0	0	1	2	0	0	0	0	1	0	1	0	0	0	0	4	1	2	2	0	0	2	0	0	.	1	1	0	2	1	0	0	2	4	.	1	3	.	7	7	7	6	7
112	1	0	74	2	4	2	1	0	1	1	0	0	0	0	1	0	0	0	0	0	0	5	1	0	0	2	0	2	2	0	2	2	2	2	2	1	2	0	1	8	6	3	3	20	4	7	3	6	3
113	0	1	85	2	5	0	0	0	1	2	0	0	1	0	1	0	0	0	0	0	0	4	3	2	2	1	1	2	2	1	2	0	1	2	2	2	2	2	1	11	7	4	3	25	5	6	7	5	6
114	1	0	85	5	.	0	0	0	1	1	0	0	0	0	1	0	0	0	0	0	0	4	2	2	1	2	0	1	2	2	2	2	2	2	0	2	2	2	2	11	5	4	6	26	6	7	7	7	7
115	0	1	60	2	3	1	1	0	1	2	0	0	1	0	1	0	0	0	0	0	0	5	1	2	1	1	0	2	1	1	2	0	2	1	2	1	0	2	1	8	5	2	4	19	5	5	4	4	4
116	0	1	82	1	4	1	1	0	1	1	0	0	0	0	1	0	0	0	0	0	0	3	0	1	0	0	2	0	1	2	2	1	2	1	2	2	0	0	2	2	7	3	6	18	6	6	5	4	4
117	0	1	66	2	3	3	0	1	1	2	0	0	0	1	1	0	0	0	0	0	0	4	1	2	2	2	2	2	2	2	2	2	2	2	2	2	1	2	1	11	10	4	5	30	7	7	7	7	6
119	0	1	81	1	4	1	1	0	1	1	0	0	0	0	1	0	0	0	0	0	0	4	0	0	0	2	2	2	0	0	1	1	0	1	2	2	1	2	2	7	6	3	2	18	4	4	4	4	4
120	1	0	85	1	5	0	0	0	3	2	0	0	1	0	1	0	0	0	0	0	0	5	0	0	0	0	0	2	0	1	0	0	0	0	2	0	1	0	1	3	2	0	2	7	5	6	6	6	6
121	1	0	72	5	4	1	1	0	2	1	0	0	0	0	1	0	0	0	0	0	0	3	1	0	2	0	0	2	0	0	1	0	0	2	2	2	0	0	0	2	5	4	0	11	5	5	6	4	6
122	0	1	86	2	5	3	0	1	.	1	0	0	0	0	1	0	0	0	0	0	0	4	0	0	0	0	0	0	0	0	0	1	0	2	0	2	0	0	0	0	1	4	0	5	2	3	6	6	7
123	1	0	88	4	4	1	1	0	1	1	0	0	0	0	1	0	0	0	0	0	0	3	0	2	0	2	2	2	2	2	2	0	0	2	2	2	0	1	2	9	6	4	4	23	7	3	7	3	7
124	0	1	80	1	5	0	0	0	2	2	0	0	1	0	1	0	0	0	0	0	0	4	0	0	0	0	2	0	1	0	0	0	0	1	2	0	1	0	1	2	4	1	1	8	5	3	3	2	3
125	1	0	79	2	4	1	1	0	2	1	0	0	0	0	1	0	0	0	0	0	0	3	1	0	0	1	1	2	2	2	1	2	2	2	2	2	2	1	2	8	6	4	6	24	4	7	7	5	7
126	1	0	66	2	5	0	0	0	2	1	0	0	0	0	1	0	0	0	0	0	0	4	0	0	0	0	1	0	0	0	0	2	0	1	2	1	0	0	0	0	5	2	0	7	4	5	5	4	7
127	1	0	82	2	4	1	0	0	1	1	0	0	0	0	1	0	0	0	0	0	0	4	0	2	1	2	0	2	2	1	2	2	2	2	0	2	2	2	2	12	5	4	5	26	7	7	6	7	7
128	0	1	81	1	5	2	1	0	1	1	0	0	0	0	1	0	0	0	0	0	0	5	0	2	0	2	2	2	1	2	2	2	0	2	2	2	2	1	2	10	8	4	4	26	5	7	7	3	7
130	0	1	80	2	5	1	0	0	1	2	0	0	1	0	1	0	0	0	0	0	0	5	0	2	2	1	0	2	0	2	1	0	2	2	2	2	2	0	2	7	5	4	6	22	7	6	4	7	6
131	1	0	71	4	5	1	1	0	2	2	0	0	1	0	1	0	0	0	0	0	0	6	1	1	0	0	0	0	1	0	1	0	1	0	0	0	0	0	0	2	1	0	1	4	5	5	6	6	7
201	1	0	70	5	5	2	1	0	2	1	0	0	0	0	1	0	0	0	0	0	0	5	1	1	2	2	2	2	2	1	1	2	0	2	0	2	0	2	1	9	7	4	2	22	5	5	6	6	5
202	0	1	71	2	4	0	0	0	2	1	0	0	0	0	1	0	0	0	0	0	0	1	0	2	2	2	1	2	2	2	1	2	2	2	2	2	2	2	1	12	8	4	5	29	4	5	5	4	3
203	0	1	80	5	7	1	0	0	2	1	0	0	1	0	0	0	0	0	0	0	0	5	1	2	.	0	1	0	0	2	1	2	1	2	0	2	0	0	1	2	.	4	4	.	4	1	5	4	5
204	1	0	89	5	3	1	1	0	1	1	0	0	0	1	0	0	0	0	0	0	0	2	1	1	1	1	1	1	1	1	2	1	2	1	1	2	1	1	2	6	6	3	5	20	7	7	7	7	7
205	1	0	84	1	5	1	1	0	2	1	0	0	0	0	1	0	0	0	0	0	0	2	1	0	0	0	2	0	0	0	2	2	1	2	0	2	0	0	.	0	6	4	.	.	3	3	5	3	5
206	1	0	85	5	5	1	1	0	1	2	1	0	0	0	1	0	0	0	0	0	0	5	2	1	2	1	1	1	2	1	1	2	2	2	1	2	2	1	1	8	7	4	4	23	6	5	4	4	4
207	1	0	82	4	3	1	1	0	2	2	0	0	0	1	1	0	0	0	0	0	0	4	1	2	2	2	0	2	2	2	2	0	2	2	0	2	1	2	1	11	4	4	5	24	6	6	6	6	6
208	1	0	78	2	4	1	1	0	2	2	0	0	0	1	0	1	0	0	0	0	0	3	2	1	0	1	0	1	1	2	2	1	1	1	1	2	2	1	2	7	4	3	5	19	4	4	5	5	7
209	1	0	76	2	3	3	1	1	2	4	0	1	1	0	1	0	0	1	0	0	0	4	3	2	2	2	2	2	2	1	2	2	2	2	2	2	2	2	2	12	10	4	5	31	5	5	5	6	6
210	1	0	66	2	7	1	1	0	2	1	0	0	0	0	0	0	1	0	0	0	0	6	2	1	2	1	2	1	1	.	1	2	1	0	2	1	1	0	0	5	9	1	.	.	2	6	2	4	5
211	1	0	71	1	4	1	1	0	3	1	0	0	0	0	1	0	0	0	0	0	0	3	2	1	2	2	2	2	2	1	1	2	2	2	2	2	2	2	1	11	9	4	4	28	5	5	6	5	5
212	1	0	76	4	5	1	1	0	2	1	0	0	0	0	0	0	0	0	0	0	1	1	0	1	0	1	0	2	0	1	0	1	0	1	0	1	1	2	1	7	1	2	2	12	5	4	5	4	5
213	0	1	82	4	7	1	0	0	3	1	0	0	1	0	0	0	0	0	0	0	0	4	1	1	1	1	1	2	2	2	1	2	1	2	2	2	2	2	1	10	7	4	4	25	7	6	7	4	6
214	0	1	83	5	5	1	1	0	2	2	0	0	1	0	0	0	1	0	0	0	0	4	2	2	2	2	2	2	2	2	2	2	2	2	2	2	2	2	2	12	10	4	6	32	7	7	6	6	7
215	1	0	60	2	4	2	1	0	3	2	0	0	0	0	0	1	1	0	0	0	0	6	0	1	0	1	2	2	2	1	1	2	.	2	2	2	2	1	2	9	7	4	.	.	6	4	6	5	6
216	1	0	71	2	5	1	1	0	2	1	0	0	0	0	1	0	0	0	0	0	0	6	1	2	2	2	2	2	1	2	1	0	2	2	2	2	0	0	1	7	7	4	5	23	4	5	5	5	6
217	0	1	85	1	7	2	0	0	1	1	0	0	0	0	1	0	0	0	0	0	0	2	1	0	0	1	2	1	0	1	1	2	2	1	2	1	1	1	1	4	7	2	4	17	4	4	5	4	4
218	0	1	76	1	7	0	0	0	2	1	0	0	1	0	0	0	0	0	0	0	0	3	0	2	2	1	2	2	1	1	2	2	1	1	2	1	1	2	1	9	10	2	3	24	6	6	4	5	4
219	0	1	74	2	4	2	0	0	1	1	0	0	0	0	0	0	1	0	0	0	0	5	0	1	0	0	0	2	2	2	1	0	0	2	2	2	0	0	0	5	3	4	2	14	5	5	7	5	5
220	1	0	81	2	6	1	1	0	2	1	0	0	1	0	0	0	0	0	0	0	0	0	0	0	0	0	0	0	0	0	0	2	0	1	2	0	0	0	0	0	4	1	0	5	4	5	5	6	7
221	1	0	70	1	4	4	1	1	2	1	0	0	0	0	1	0	0	0	0	0	0	5	2	1	0	1	0	2	2	2	1	0	1	2	0	1	1	1	1	8	1	3	4	16	4	4	4	4	5
222	0	1	85	5	7	2	0	0	1	1	0	0	0	0	1	0	0	0	0	0	0	2	0	1	1	.	0	2	.	0	.	.	2	.	0	0	0	.	0	.	.	.	2	.	5	5	5	1	5
223	0	1	83	5	4	0	0	0	2	0	0	0	0	0	0	0	0	0	0	0	0	3	3	1	0	1	2	1	1	1	1	1	1	1	0	1	1	1	1	6	4	2	3	15	5	4	4	4	4
301	1	0	81	4	2	1	1	0	2	1	0	0	0	0	1	0	0	0	0	0	0	5	2	2	2	2	2	2	2	2	2	2	1	2	2	2	1	1	2	10	10	4	5	29	4	5	5	3	5
302	0	1	85	1	6	1	1	0	3	1	0	0	1	0	0	0	0	0	0	0	0	1	0	1	0	1	0	2	0	2	1	2	2	1	2	2	0	1	2	5	5	3	6	19	2	4	3	3	2
303	0	1	71	2	6	1	1	0	2	1	0	0	0	0	1	0	0	0	0	0	0	3	1	2	0	2	2	2	2	2	2	0	2	2	0	2	2	2	2	12	4	4	6	26	7	7	7	7	7
304	0	1	72	2	6	1	1	0	2	1	0	0	0	0	1	0	0	0	0	0	0	2	2	0	1	1	1	1	2	0	1	2	0	1	2	2	1	1	0	6	7	3	0	16	5	5	5	4	5
305	0	1	74	1	7	6	0	1	4	2	0	0	1	0	1	0	0	0	0	0	0	1	1	2	2	1	1	2	1	2	0	0	2	1	2	1	1	1	2	8	5	2	6	21	4	4	5	5	5
306	0	1	66	2	6	1	1	0	2	1	0	0	0	0	1	0	0	0	0	0	0	3	1	2	2	2	2	2	2	2	2	2	1	2	2	2	0	1	1	9	10	4	4	27	7	5	4	5	6
307	1	0	76	2	3	0	0	0	3	1	0	0	0	0	0	0	0	0	0	0	1	0	0	1	0	2	0	2	0	1	0	0	0	0	2	0	1	0	0	6	2	0	1	9	6	5	5	5	6
308	1	0	83	1	4	0	0	0	3	1	0	0	0	0	0	0	0	0	0	0	1	6	0	0	1	1	2	2	2	2	2	0	1	2	1	2	1	2	2	8	6	4	5	23	7	7	6	6	7
309	1	0	72	4	4	1	1	0	3	1	0	0	0	0	1	0	0	0	0	0	0	3	5	0	1	2	0	2	2	1	2	2	2	2	2	2	2	2	1	10	7	4	4	25	6	5	5	7	7
310	0	1	71	4	6	1	1	0	1	2	1	0	0	0	1	0	0	0	0	0	0	4	1	2	0	2	.	2	2	1	1	1	1	2	2	2	1	1	1	10	.	4	3	.	5	5	2	2	5
311	0	1	73	2	7	4	1	1	2	1	0	0	0	0	0	0	0	0	0	0	1	2	1	2	0	1	1	1	2	1	1	1	1	1	2	1	2	2	2	10	5	2	4	21	7	6	4	5	4
312	0	1	83	1	7	1	0	0	2	2	0	0	1	0	1	0	0	0	0	0	0	5	2	2	2	2	2	2	1	.	2	2	2	2	2	2	1	2	2	10	10	4	.	.	5	5	4	4	5
313	1	0	77	2	5	1	1	0	2	1	0	0	0	0	1	0	0	0	0	0	0	6	1	1	1	0	1	2	0	0	0	1	0	1	0	2	0	0	2	3	3	3	2	11	1	1	4	1	5
314	0	1	77	1	7	3	0	1	2	1	0	0	0	0	1	0	0	0	0	0	0	3	1	1	1	1	2	1	2	0	1	2	1	1	1	1	0	0	0	5	7	2	1	15	3	3	3	3	3
315	1	0	82	2	6	1	1	0	3	1	0	0	0	0	1	0	0	0	0	0	0	3	0	2	0	2	2	2	0	2	2	2	2	2	2	2	2	1	2	9	8	4	6	27	5	5	5	5	5
316	1	0	88	2	3	3	0	1	1	1	0	0	0	0	1	0	0	0	0	0	0	0	0	0	0	0	2	0	0	0	2	2	0	2	2	2	0	0	0	0	8	4	0	12	5	5	3	1	2
317	0	1	72	2	3	2	1	0	2	1	0	0	0	0	1	0	0	0	0	0	0	3	0	1	1	1	2	1	1	1	1	2	1	1	1	1	1	1	1	6	7	2	3	18	5	4	3	3	3
318	1	0	67	1	2	1	1	0	2	1	0	0	0	0	1	0	0	0	0	0	0	3	1	1	1	2	1	2	1	2	1	2	1	2	1	2	2	1	1	9	6	4	4	23	5	5	4	4	4
319	0	1	88	5	6	6	0	1	1	1	0	0	0	0	1	0	0	0	0	0	0	2	0	0	.	2	2	0	0	0	.	0	0	2	2	1	0	0	0	2	.	3	0	.	1	1	1	1	2
320	1	0	69	2	4	1	1	0	2	1	0	0	0	0	1	0	0	0	0	0	0	3	0	0	0	2	2	2	0	0	0	2	0	2	1	2	1	2	0	7	5	4	0	16	5	6	7	.	6
321	1	0	88	5	.	5	1	1	2	1	0	0	0	0	1	0	0	0	0	0	0	0	0	0	1	0	1	0	0	0	0	0	0	0	2	1	0	0	0	0	4	1	0	5	4	4	4	3	4
322	0	1	77	1	7	0	0	0	2	2	0	0	1	1	0	0	0	0	0	0	0	7	2	2	2	2	1	1	2	1	2	2	1	1	2	1	2	1	1	10	9	2	3	24	6	5	5	5	6
323	1	0	85	4	6	4	1	1	2	1	0	0	0	0	1	0	0	0	0	0	0	1	1	2	2	2	2	1	0	0	2	2	0	1	2	0	1	1	0	7	10	1	0	18	6	5	6	4	5
324	1	0	82	1	5	0	0	0	2	1	0	0	1	0	0	0	0	0	0	0	0	7	0	2	2	2	2	2	0	2	1	2	2	1	2	2	2	1	1	9	9	3	5	26	4	4	5	5	4
325	1	0	72	2	4	1	1	0	2	2	0	0	0	0	1	0	1	0	0	0	0	6	1	0	2	2	2	2	2	2	1	1	1	2	2	2	0	2	0	8	8	4	3	23	6	6	7	6	7
326	0	1	89	1	6	2	0	0	1	1	0	0	0	0	1	0	0	0	0	0	0	7	2	1	1	2	2	2	2	1	2	2	1	2	2	1	2	1	1	10	9	3	3	25	6	6	6	6	6
327	0	1	79	4	5	1	1	0	2	3	0	0	1	0	1	0	0	1	0	0	0	4	1	2	1	2	1	2	2	2	1	0	2	1	0	2	1	2	2	11	3	3	6	23	6	5	4	4	4
328	0	1	75	4	6	4	1	1	2	2	0	0	0	0	1	0	0	1	0	0	0	4	4	2	2	2	2	2	1	2	2	2	2	2	2	2	2	1	2	10	10	4	6	30	5	5	6	5	6
329	1	0	66	2	6	4	1	1	2	2	0	0	0	1	1	0	0	0	0	0	0	3	2	2	1	1	1	2	1	1	1	2	1	1	1	2	1	1	1	8	6	3	3	20	4	5	5	4	4
330	1	0	81	1	7	3	1	1	1	2	1	0	1	0	0	0	0	0	0	0	0	3	2	2	2	2	1	2	2	0	2	2	1	2	2	2	0	2	0	10	9	4	1	24	7	5	6	6	7
331	1	0	69	5	4	1	1	0	3	0	0	0	0	0	0	0	0	0	0	0	0	0	1	1	1	1	2	.	0	0	2	2	.	0	2	0	0	0	0	.	9	0	.	.	4	4	4	4	5
332	0	1	70	1	7	0	0	0	2	3	0	0	1	1	0	0	1	0	0	0	0	7	3	2	2	2	2	2	2	2	2	2	1	1	2	2	2	2	1	12	10	3	4	29	6	5	5	7	7
333	1	0	58	2	4	5	1	1	3	1	0	0	0	0	1	0	0	0	0	0	0	3	0	0	0	1	1	1	1	1	0	1	0	1	2	1	0	0	0	3	4	2	1	10	3	4	3	4	4
334	1	0	54	2	6	3	1	0	2	1	0	0	0	0	0	0	0	0	0	1	0	6	0	2	2	2	2	2	0	1	1	2	1	1	2	2	1	2	2	9	9	3	4	25	6	3	4	4	4
335	1	0	76	1	6	0	0	0	2	1	0	0	1	0	0	0	0	0	0	0	0	3	1	2	1	2	2	2	1	1	1	2	1	2	2	2	1	1	2	9	8	4	4	25	4	4	4	4	4
336	1	0	74	5	7	6	1	1	2	1	0	0	0	0	1	0	0	0	0	0	0	4	4	2	2	2	2	2	2	1	2	2	2	2	2	2	1	2	1	11	10	4	4	29	7	7	7	6	.
401	1	0	64	2	4	2	1	0	2	1	0	0	0	0	1	0	0	0	0	0	0	3	2	1	0	1	0	2	2	0	1	0	1	2	1	1	1	2	1	9	2	3	2	16	4	5	4	5	4
402	0	1	82	5	5	0	0	0	3	3	0	0	0	1	0	1	1	0	0	0	0	1	2	0	2	2	2	2	1	1	1	1	1	0	1	1	1	1	0	7	7	1	2	17	5	5	5	5	5
403	0	1	82	5	6	0	0	0	3	1	0	0	0	0	0	0	0	0	0	0	1	4	2	1	.	0	.	1	.	.	1	2	1	2	2	0	2	.	0	.	.	2	.	.	7	6	5	6	6
404	0	1	89	1	5	0	0	0	1	1	0	0	0	0	1	0	0	0	0	0	0	5	2	1	2	1	2	0	1	0	2	1	1	1	2	0	2	0	1	5	9	1	2	17	4	6	6	6	5
405	0	1	63	2	3	2	1	0	2	0	0	0	0	0	0	0	0	0	0	0	0	3	1	0	0	0	0	2	2	0	0	0	0	2	2	2	0	2	0	6	2	4	0	12	6	7	6	6	6
406	0	1	79	5	7	4	0	1	2	1	0	0	1	0	0	0	0	0	0	0	0	1	2	2	2	2	2	1	0	2	2	2	2	1	2	2	2	2	2	9	10	3	6	28	7	5	7	7	5
407	1	0	73	2	5	1	1	0	2	1	0	0	0	0	1	0	0	0	0	0	0	2	2	0	1	2	2	2	1	1	1	1	0	1	1	1	1	0	0	6	6	2	1	15	6	5	4	4	5
408	0	1	86	5	7	5	0	0	2	1	0	0	0	0	1	0	0	0	0	0	0	5	2	2	2	2	2	2	2	1	2	2	2	2	2	1	1	2	1	11	10	3	4	28	6	5	6	5	6
409	0	1	84	1	7	1	0	0	2	2	0	0	0	0	1	0	1	0	0	0	0	3	2	2	2	.	2	2	1	1	2	2	2	2	2	2	1	2	1	.	10	4	4	.	6	5	6	5	5
410	0	1	68	1	5	3	1	1	2	1	0	0	0	0	1	0	0	0	0	0	0	6	1	2	1	2	1	1	2	2	1	2	2	1	2	2	1	2	2	10	7	3	6	26	7	4	6	7	7
411	1	0	82	5	6	1	1	0	2	3	0	0	0	0	1	1	1	0	0	0	0	0	2	2	2	2	2	2	2	1	2	2	2	2	2	2	2	2	1	12	10	4	4	30	4	5	5	5	5
412	0	1	82	5	5	0	0	0	1	1	0	0	0	0	1	0	0	0	0	0	0	0	0	0	1	0	2	.	2	0	2	2	0	0	2	0	0	0	0	.	9	0	0	.	7	7	7	.	5
413	1	0	65	5	2	2	1	0	2	2	0	0	0	0	1	0	1	0	0	0	0	3	2	2	1	2	1	2	2	2	1	1	1	2	1	2	2	2	2	12	5	4	5	26	4	5	5	6	5
414	0	1	84	1	7	0	0	0	2	1	0	0	0	0	0	0	0	0	0	0	1	3	3	2	2	2	2	2	2	2	2	2	2	2	2	2	2	2	0	12	10	4	4	30	6	6	5	5	5
415	0	1	75	2	6	0	0	0	3	1	0	0	0	1	0	0	0	0	0	0	0	7	1	2	1	1	2	2	2	1	1	1	1	1	2	1	1	1	1	9	7	2	3	21	5	5	4	4	5
416	0	1	82	1	7	0	0	0	2	1	0	0	0	0	0	0	1	0	0	0	0	1	2	1	1	2	2	1	2	1	1	1	0	0	0	0	0	0	0	6	5	0	1	12	4	4	5	4	5
418	0	1	73	2	4	1	1	0	2	3	0	0	0	1	1	0	1	0	0	0	0	5	1	2	2	2	1	2	2	1	1	2	1	1	2	2	2	1	1	11	8	3	3	25	5	4	5	4	5
419	1	0	67	2	6	1	1	0	2	1	0	0	0	0	1	0	0	0	0	0	0	1	1	2	1	2	1	2	2	2	1	.	2	2	.	2	2	2	1	12	.	4	5	.	7	5	6	6	6
420	0	1	89	5	4	1	0	0	1	3	0	0	0	1	1	0	0	1	0	0	0	4	1	2	1	2	2	2	1	1	2	2	1	2	2	2	2	2	1	11	9	4	3	27	5	5	2	2	3
421	0	1	71	4	6	1	1	0	2	1	0	0	0	0	1	0	0	0	0	0	0	1	2	0	1	0	2	1	0	0	0	1	0	0	2	0	0	0	0	1	6	0	0	7	4	3	4	5	6
422	1	0	82	1	6	0	0	0	2	2	0	0	1	1	0	0	0	0	0	0	0	10	3	1	0	1	0	2	2	2	2	0	2	1	0	0	1	1	0	8	2	1	4	15	5	7	6	4	4
423	1	0	86	4	5	0	0	0	2	1	0	0	1	0	0	0	0	0	0	0	0	7	1	2	2	2	2	2	2	2	1	2	0	1	2	2	2	2	2	12	9	3	4	28	4	7	5	5	4
424	0	1	84	5	5	3	0	1	2	1	0	0	0	0	1	0	0	0	0	0	0	0	2	0	2	0	2	0	0	0	2	1	0	1	2	0	0	0	0	0	9	1	0	10	5	4	4	3	5
425	0	1	82	1	4	0	0	0	2	1	0	0	1	0	0	0	0	0	0	0	0	4	1	2	2	2	2	2	0	2	2	2	2	1	1	2	0	1	2	7	9	3	6	25	3	2	5	3	3
426	0	1	66	4	6	2	0	0	3	1	0	0	0	0	0	0	0	0	0	0	1	0	2	1	0	1	0	1	2	0	0	0	0	2	2	0	0	1	0	6	2	2	0	10	7	7	4	5	7
427	0	1	84	1	7	3	0	0	1	1	0	0	0	0	1	0	0	0	0	0	0	1	1	2	0	1	1	1	1	1	2	.	.	1	2	2	1	1	1	7	.	3	.	.	5	5	4	5	7
428	0	1	69	2	6	1	1	0	2	1	0	0	0	0	1	0	0	0	0	0	0	2	3	2	1	2	2	2	1	1	1	2	0	1	0	2	1	2	1	10	6	3	2	21	6	7	6	5	5
429	1	0	76	1	4	1	1	0	1	2	0	0	0	1	1	0	0	0	0	0	0	4	1	2	2	2	2	1	1	2	1	2	1	1	2	2	1	1	2	8	9	3	5	25	5	6	4	5	6
430	0	1	89	1	5	0	0	0	2	3	0	0	1	1	1	0	0	0	0	0	0	3	2	2	2	2	2	2	0	2	2	2	2	2	2	0	2	2	2	10	10	2	6	28	6	4	7	5	5
431	0	1	61	2	4	2	1	0	2	1	0	0	0	0	1	0	0	0	0	0	0	2	2	2	2	2	2	2	2	1	1	2	1	2	2	2	1	2	2	11	9	4	4	28	5	5	4	4	4
432	0	1	85	1	5	2	0	0	1	2	0	0	0	0	1	0	0	0	0	0	1	2	2	2	1	1	1	1	1	1	2	1	1	1	1	1	1	1	1	7	6	2	3	18	2	5	6	6	5
433	1	0	66	2	4	2	1	0	2	1	0	0	0	0	1	0	0	0	0	0	0	3	3	2	2	2	2	2	2	1	2	2	2	2	2	2	2	2	2	12	10	4	5	31	7	7	7	7	7
434	0	1	83	4	5	2	0	0	2	1	0	0	0	0	1	0	0	0	0	0	0	10	0	0	0	0	0	0	1	1	1	0	1	0	2	2	1	1	2	3	3	2	4	12	5	4	2	4	5
435	0	1	78	1	7	3	0	1	3	1	0	0	0	0	1	0	0	0	0	0	0	1	1	2	2	2	0	2	0	0	1	2	1	0	2	1	0	2	0	8	7	1	1	17	6	5	5	4	4
436	0	1	85	1	4	2	0	0	2	1	0	0	0	0	1	0	0	0	0	0	0	2	2	1	1	2	2	2	1	2	2	2	2	2	2	2	1	1	2	8	9	4	6	27	5	3	4	5	5
437	1	0	50	2	5	2	1	0	3	2	0	0	0	0	1	0	0	0	0	1	0	6	1	2	2	2	2	2	1	2	1	2	2	2	2	2	2	1	2	10	9	4	6	29	6	5	4	3	5
438	0	1	79	1	7	5	1	1	2	1	0	0	0	0	1	0	0	0	0	0	0	14	0	2	2	0	0	0	0	2	1	0	2	2	2	2	0	0	2	2	5	4	6	17	4	5	7	4	4
439	1	0	73	2	4	5	0	1	1	1	0	0	0	0	1	0	0	0	0	0	0	5	1	1	2	2	2	2	2	0	2	2	2	2	2	2	2	1	2	10	10	4	4	28	6	6	7	6	7
501	0	1	83	1	7	4	0	1	2	2	0	0	0	0	1	0	1	0	0	0	0	4	2	2	2	2	2	2	2	2	2	2	2	1	2	2	2	2	2	12	10	3	6	31	6	5	6	6	5
502	1	0	69	2	3	2	1	0	2	2	0	0	0	1	1	0	0	0	0	0	0	7	3	2	2	2	2	2	2	2	2	2	1	2	2	2	2	2	2	12	10	4	5	31	7	7	6	7	7
503	1	0	63	2	5	3	1	0	3	0	0	0	0	0	0	0	0	0	0	0	0	5	1	0	0	1	0	0	0	1	1	0	1	1	1	1	1	1	1	3	2	2	3	10	3	3	4	4	3
504	0	1	82	1	6	3	0	1	2	1	0	0	0	0	1	0	0	0	0	0	0	5	1	2	2	0	1	2	2	0	1	1	0	1	0	1	0	2	1	8	5	2	1	16	6	5	6	5	6
505	0	1	75	2	6	2	1	0	2	1	0	0	1	0	0	0	0	0	0	0	0	3	3	2	1	0	2	1	1	2	2	2	2	2	2	2	2	1	2	7	9	4	6	26	6	6	7	4	6
506	0	1	84	1	4	0	0	0	2	1	0	0	1	0	0	0	0	0	0	0	0	3	1	0	1	2	1	2	1	1	1	1	1	1	1	1	2	2	2	9	5	2	4	20	5	6	6	6	6
507	1	0	79	2	5	1	1	0	2	2	0	0	0	0	1	0	0	0	0	0	1	2	2	2	1	2	2	1	2	2	2	1	2	1	2	2	1	1	2	9	8	3	6	26	5	7	6	4	6
508	0	1	77	5	6	1	0	0	2	2	0	0	1	0	1	0	0	0	0	0	0	5	2	2	2	2	2	2	1	2	2	2	2	2	2	2	1	1	2	9	10	4	6	29	5	4	4	4	4
509	0	1	76	1	3	1	0	0	2	1	0	0	0	0	1	0	0	0	0	0	0	3	1	2	2	2	2	2	2	2	2	2	1	2	2	2	2	2	1	12	10	4	4	30	5	5	5	5	5
510	1	0	64	2	7	2	1	0	3	1	0	0	0	0	1	0	0	0	0	0	0	5	1	0	1	1	1	2	2	1	1	1	1	2	1	2	1	1	1	7	5	4	3	19	6	6	5	6	5
511	0	1	73	1	7	1	1	0	2	2	0	0	1	0	1	0	0	0	0	0	0	4	3	2	2	2	2	2	2	0	0	2	1	2	2	2	1	0	1	9	8	4	2	23	6	4	7	6	6
512	1	0	76	2	6	2	1	0	2	1	0	0	0	0	1	0	0	0	0	0	0	1	0	2	2	0	1	0	0	2	1	0	1	1	1	1	0	2	2	4	5	2	5	16	1	2	1	1	2
513	1	0	74	1	4	1	1	0	2	3	0	0	0	0	1	0	1	0	0	0	1	3	1	2	2	2	2	2	2	1	1	2	1	2	2	2	1	2	1	11	9	4	3	27	5	7	6	5	5
514	1	0	81	2	4	1	1	0	2	2	0	0	0	0	0	0	1	1	0	0	0	2	3	2	2	2	2	2	1	2	2	2	1	1	2	1	1	2	2	10	10	2	5	27	6	7	7	7	7
515	1	0	51	2	4	4	1	0	3	3	0	1	0	0	1	0	0	0	0	1	0	7	1	2	2	2	2	2	2	2	2	2	2	2	2	2	2	2	2	12	10	4	6	32	7	6	6	6	5
516	0	1	81	1	5	0	0	0	1	4	0	0	0	1	1	0	1	1	0	0	0	4	3	2	2	2	2	2	2	2	2	2	2	2	2	2	2	2	2	12	10	4	6	32	6	6	7	7	7
517	1	0	80	2	4	1	1	0	2	1	0	0	0	0	1	0	0	0	0	0	0	7	1	0	2	0	2	1	0	1	1	2	1	1	2	2	1	0	1	2	9	3	3	17	6	5	5	6	6
518	0	1	85	1	6	1	0	0	2	1	0	0	0	0	1	0	0	0	0	0	0	1	0	1	0	0	0	0	2	1	1	1	1	0	1	1	2	2	1	7	3	1	3	14	5	3	4	5	4
519	1	0	68	4	4	1	1	0	2	1	0	0	0	0	1	0	0	0	0	0	0	7	1	2	0	0	2	2	2	1	2	2	1	2	2	2	2	2	1	10	8	4	3	25	5	5	7	3	2
520	0	1	70	2	4	0	0	0	2	2	1	0	0	0	0	0	0	1	0	0	0	2	2	1	2	2	2	2	2	2	2	2	2	2	2	2	2	2	2	11	10	4	6	31	7	7	6	6	6
521	0	1	79	1	6	4	1	1	2	3	0	0	0	1	0	0	1	0	0	0	1	4	2	2	2	2	2	2	2	2	2	2	2	2	2	2	2	2	2	12	10	4	6	32	6	5	4	5	5
522	0	1	48	2	3	2	1	0	2	0	0	0	0	0	0	0	0	0	0	0	0	1	2	0	0	1	1	1	1	0	1	1	1	1	2	0	0	0	0	3	5	1	1	10	4	2	4	4	3
523	0	1	81	4	7	3	0	1	2	1	0	0	0	0	1	0	0	0	0	0	0	1	2	0	1	1	2	0	0	0	1	1	0	0	1	1	0	0	1	1	6	1	1	9	4	5	5	5	5
524	0	1	80	1	5	1	1	0	2	2	0	0	1	0	0	0	0	0	0	0	1	3	1	2	0	2	0	1	1	2	1	1	1	1	1	1	1	0	1	7	3	2	4	16	4	4	5	4	5
525	1	0	79	1	7	1	1	0	2	1	0	0	0	0	1	0	0	0	0	0	0	1	7	0	1	2	2	2	1	2	2	1	2	2	2	2	1	1	2	7	8	4	6	25	6	5	4	5	7
526	1	0	81	4	6	3	0	0	1	1	0	0	0	0	1	0	0	0	0	0	0	2	0	0	1	1	1	0	0	1	0	1	1	1	2	1	1	1	1	3	5	2	3	13	5	5	4	4	5
527	1	0	63	2	4	4	1	1	3	1	0	0	0	0	1	0	0	0	0	0	0	3	1	1	0	2	1	0	0	0	0	1	1	1	0	0	0	0	0	3	2	1	1	7	6	4	5	5	6
528	0	1	82	1	4	0	0	0	2	4	0	0	1	0	1	1	1	0	0	0	0	3	1	2	2	2	2	2	2	2	2	2	2	2	2	2	2	2	2	12	10	4	6	32	7	6	7	5	7
529	1	0	88	2	7	3	1	0	2	2	0	0	0	0	1	0	1	0	0	0	0	1	1	2	1	2	2	1	1	1	1	1	2	2	2	2	1	1	2	8	7	4	5	24	4	5	4	4	5
530	1	0	74	2	4	2	1	0	2	1	0	0	0	0	1	0	0	0	0	0	0	4	4	0	2	2	2	2	2	0	1	2	0	1	2	2	2	0	1	8	9	3	1	21	6	5	6	5	6
531	0	1	82	1	4	1	0	0	2	1	0	0	0	0	1	0	0	0	0	0	0	4	0	2	2	2	2	2	2	2	2	0	0	0	2	2	0	0	0	8	8	2	2	20	7	7	7	6	7
532	1	0	67	2	3	1	1	0	2	1	0	0	0	0	1	0	0	0	0	0	0	6	3	2	2	2	1	2	1	2	1	2	1	2	2	2	2	2	2	11	8	4	5	28	5	6	7	6	7
533	1	0	86	1	4	2	0	0	2	1	0	0	0	0	1	0	0	0	0	0	0	3	2	1	1	2	2	2	0	0	2	2	0	2	0	2	2	2	2	9	7	4	2	22	6	5	7	7	6
536	1	0	57	2	4	2	1	0	2	2	0	0	0	0	1	0	0	0	0	1	0	6	2	.	.	.	.	.	.	.	.	.	.	.	.	.	.	.	.	.	.	.	.	.	.	.	.	.	.
537	0	1	90	1	5	4	0	1	1	1	0	0	0	0	1	0	0	0	0	0	0	3	3	2	2	2	2	2	2	2	2	2	2	2	2	2	2	2	2	12	10	4	6	32	7	7	7	7	7
538	1	0	51	1	4	3	1	0	3	3	0	0	0	1	1	0	1	0	0	0	0	4	1	1	0	2	1	2	2	1	1	1	1	2	2	2	2	1	1	10	5	4	3	22	6	7	5	5	7
539	1	0	77	3	5	1	1	0	2	1	0	0	0	0	1	0	0	0	0	0	0	0	2	2	1	1	1	2	1	0	1	1	1	2	1	1	0	0	0	6	5	3	1	15	4	5	5	4	4
540	0	1	86	1	3	3	0	1	1	1	0	0	0	0	1	0	0	0	0	0	0	4	1	0	1	1	0	0	1	0	1	2	2	1	2	2	1	2	1	5	6	3	3	17	4	5	5	4	7
542	0	1	73	2	3	2	1	0	1	1	0	0	0	0	1	0	0	0	0	0	0	6	0	2	2	2	2	1	2	1	2	2	1	2	2	2	1	1	1	9	10	4	3	26	5	5	5	5	5
543	0	1	86	2	5	1	0	0	2	1	0	0	0	0	1	0	0	0	0	0	0	3	0	2	0	1	0	1	0	0	1	0	2	2	0	2	0	2	0	6	1	4	2	13	5	4	5	5	5
545	0	1	72	1	7	1	1	0	2	4	1	0	1	1	1	0	0	0	0	0	0	5	3	2	2	2	2	2	1	2	2	2	2	2	2	2	1	2	2	10	10	4	6	30	6	5	4	4	5
546	1	0	86	4	4	0	0	0	2	1	0	0	1	0	0	0	0	0	0	0	0	10	2	1	1	1	1	1	1	1	1	0	1	1	0	1	1	1	1	6	3	2	3	14	5	5	4	4	5
547	1	0	89	3	4	0	0	0	1	1	0	0	0	0	0	0	1	0	0	0	0	4	1	2	2	2	1	1	1	1	2	1	1	1	0	2	0	1	0	7	6	3	2	18	5	5	7	4	5
548	1	0	65	2	2	1	1	0	2	0	0	0	0	0	0	0	0	0	0	0	0	3	0	2	0	2	1	0	0	2	1	2	0	2	2	2	0	2	0	6	6	4	2	18	5	1	1	1	1
549	1	0	69	2	4	3	1	0	1	1	0	0	0	0	1	0	0	0	0	0	0	1	1	1	1	2	2	2	2	2	2	2	2	1	1	2	2	2	2	11	8	3	6	28	6	7	7	6	7
550	0	1	90	1	7	0	0	0	2	2	0	0	1	1	0	0	0	0	0	0	0	5	1	1	0	2	0	2	1	0	1	0	1	2	0	1	1	1	1	8	1	3	2	14	6	6	6	6	6
551	0	1	88	1	3	4	0	1	1	1	0	0	0	0	1	0	0	0	0	0	0	1	0	0	2	0	2	0	0	0	0	2	0	0	2	0	0	0	0	0	8	0	0	8	2	2	2	2	5
556	1	0	73	2	4	1	1	0	2	1	0	0	0	0	1	0	0	0	0	0	0	6	2	1	1	1	2	0	1	0	1	2	1	1	2	0	1	1	1	5	8	1	2	16	6	6	5	5	5
557	1	0	75	2	4	2	1	0	4	1	0	0	0	0	1	0	0	0	0	0	0	7	1	0	0	0	0	2	0	0	0	0	0	0	2	0	0	0	0	2	2	0	0	4	5	7	5	4	4
558	1	0	76	2	3	5	1	1	2	1	0	0	0	0	1	0	0	0	0	0	0	4	2	2	0	2	2	1	1	0	1	0	2	1	2	2	0	0	2	6	5	3	4	18	4	6	5	3	5
602	1	0	85	2	5	0	0	0	2	1	0	0	1	0	0	0	0	0	0	0	0	2	1	0	0	0	1	2	0	0	0	0	0	0	1	0	0	0	0	2	2	0	0	4	1	3	1	1	2
603	0	1	90	2	5	0	0	0	1	1	0	0	1	0	0	0	0	0	0	0	0	2	0	1	1	1	2	0	0	0	2	1	0	0	2	1	0	0	1	2	8	1	1	12	5	4	4	5	3
604	1	0	65	2	7	3	1	0	2	2	0	0	0	0	1	0	0	1	0	0	0	1	2	2	0	2	1	2	0	2	1	1	2	2	2	2	1	2	2	9	5	4	6	24	5	6	5	5	6
605	0	1	74	1	4	0	0	0	2	1	0	0	1	0	0	0	0	0	0	0	0	4	1	2	0	0	1	1	1	0	1	1	1	1	1	1	1	0	0	5	4	2	1	12	4	4	4	4	4
606	1	0	80	2	4	1	1	0	2	1	0	0	0	0	1	0	0	0	0	0	0	3	2	2	2	2	2	2	2	2	2	2	2	2	2	2	2	2	2	12	10	4	6	32	7	7	7	7	7
607	0	1	83	3	6	1	1	0	2	3	0	0	1	0	1	0	0	1	0	0	0	6	2	2	2	2	2	2	2	2	2	2	2	2	2	2	1	2	2	11	10	4	6	31	6	6	6	6	6
610	0	1	82	1	7	1	1	0	2	2	0	0	1	0	1	0	0	0	0	0	0	1	0	2	1	1	1	1	1	2	1	2	2	2	1	2	1	2	2	8	6	4	6	24	4	7	6	6	4
611	0	1	81	1	6	0	0	0	1	3	0	0	1	1	0	0	1	0	0	0	0	7	2	2	2	1	1	1	2	1	1	2	0	1	2	1	1	1	1	8	8	2	2	20	5	5	7	5	7
612	1	0	73	1	6	1	1	0	2	2	0	0	1	0	1	0	0	0	0	0	0	5	1	2	1	2	1	2	1	2	1	1	2	2	1	2	2	2	1	11	5	4	5	25	6	6	5	4	4
614	1	0	63	2	4	5	1	1	2	1	0	0	0	0	1	0	0	0	0	0	0	3	1	1	1	2	2	2	2	1	1	1	1	2	1	1	1	1	2	9	6	3	4	22	7	6	6	6	7
617	0	1	74	2	4	5	1	1	2	1	0	0	0	0	1	0	0	0	0	0	0	7	0	2	2	2	2	2	2	0	2	0	2	2	2	2	2	2	2	12	8	4	4	28	5	6	6	6	6
618	0	1	88	1	5	0	0	0	3	2	0	0	1	1	0	0	0	0	0	0	0	4	2	0	2	0	0	0	.	0	2	0	0	1	0	0	2	2	0	.	4	1	0	.	5	6	6	5	6
619	0	1	84	4	6	0	0	0	2	3	0	0	1	1	1	0	0	0	0	0	0	3	2	2	2	2	2	2	2	2	2	2	2	2	2	2	2	2	2	12	10	4	6	32	6	7	7	5	5
621	1	0	78	2	4	1	1	0	2	3	0	0	0	1	1	0	1	0	0	0	0	5	1	2	0	2	2	2	1	1	2	2	1	2	2	2	1	2	1	10	8	4	3	25	6	5	7	6	7
624	0	1	79	2	5	1	1	0	3	1	0	0	0	0	1	0	0	0	0	0	0	6	0	2	1	2	1	2	1	2	1	2	2	2	2	2	1	1	1	9	7	4	5	25	5	5	4	4	5
626	0	1	86	3	5	1	1	0	1	2	0	0	1	0	1	0	0	0	0	0	0	1	3	2	2	2	1	2	1	2	1	2	2	2	2	2	2	2	2	11	8	4	6	29	6	6	6	5	4
627	1	0	80	2	6	1	1	0	2	5	1	0	0	1	1	0	1	1	0	0	0	17	11	2	2	2	2	2	2	1	2	2	2	2	2	2	2	2	2	12	10	4	5	31	7	6	6	6	6
628	0	1	85	1	4	0	0	0	1	2	0	0	1	0	1	0	0	0	0	0	0	4	0	0	2	2	0	1	0	0	0	1	0	2	2	1	0	0	0	3	5	3	0	11	6	5	7	4	5
631	0	1	83	1	6	1	1	0	1	4	1	0	1	0	1	0	0	1	0	0	0	7	0	2	2	2	2	2	1	2	1	2	2	2	2	2	0	0	1	7	9	4	5	25	7	5	5	4	5
632	0	1	84	2	6	0	0	0	1	2	0	0	0	1	1	0	0	0	0	0	0	7	2	2	2	2	2	2	0	2	2	2	1	1	2	0	1	0	2	7	10	1	5	23	4	4	5	5	7
633	0	1	95	1	6	3	0	1	2	1	0	0	0	0	1	0	0	0	0	0	0	4	1	2	1	2	2	1	1	0	1	2	1	1	2	0	0	0	0	6	8	1	1	16	2	5	4	5	5
635	0	1	83	2	4	1	1	0	2	1	0	0	0	0	1	0	0	0	0	0	0	3	0	1	1	1	1	1	1	1	1	1	1	1	1	1	1	1	1	6	5	2	3	16	4	4	4	4	4
637	1	0	65	2	4	1	1	0	3	2	0	0	0	1	1	0	0	0	0	0	0	5	1	2	2	2	0	2	2	2	2	0	2	2	1	2	2	2	2	12	5	4	6	27	5	5	3	5	4
701	0	1	78	1	7	0	0	0	3	2	0	0	0	1	1	0	0	0	0	0	0	4	2	2	2	2	2	2	2	2	1	2	2	2	2	2	0	2	1	10	9	4	5	28	4	4	5	4	5
702	0	1	80	2	6	5	0	1	2	1	0	0	0	0	1	0	0	0	0	0	0	0	0	0	0	2	0	2	2	0	2	2	0	2	0	2	0	0	0	6	4	4	0	14	5	5	6	6	7
703	0	1	68	2	7	4	0	1	2	1	0	0	0	0	1	0	0	0	0	0	0	1	1	0	1	1	2	0	1	1	0	2	0	2	1	2	1	0	1	3	6	4	2	15	5	5	5	3	5
704	1	0	77	5	5	1	1	0	2	2	0	0	1	0	1	0	0	0	0	0	0	10	2	2	0	0	0	0	0	0	0	0	0	1	0	0	0	0	0	2	0	1	0	3	1	1	2	1	1
705	1	0	87	1	3	1	1	0	1	1	0	0	0	0	1	0	0	0	0	0	0	1	1	2	0	0	0	0	0	0	0	0	0	0	2	0	0	0	0	2	2	0	0	4	6	3	5	5	6
706	0	1	80	1	2	1	1	0	2	1	0	0	1	0	0	0	0	0	0	0	0	3	5	2	1	2	1	2	1	0	2	2	1	2	2	1	1	2	0	10	8	3	1	22	6	5	7	4	6
707	0	1	66	1	6	5	1	1	2	2	0	0	0	1	1	0	0	0	0	0	0	6	4	1	2	2	2	2	2	1	1	2	0	1	0	2	2	2	1	11	7	3	2	23	4	5	5	4	5
708	0	1	86	1	3	1	1	0	1	1	0	0	0	0	1	0	0	0	0	0	0	3	2	0	0	2	2	2	1	2	2	2	2	2	2	2	2	2	2	9	8	4	6	27	6	5	7	7	7
709	0	1	89	1	5	3	0	1	2	1	0	0	0	0	1	0	0	0	0	0	0	6	2	2	1	0	0	2	2	0	1	0	2	1	2	2	1	2	2	9	4	3	4	20	3	5	3	5	5
710	0	1	83	1	6	2	0	0	2	1	0	0	1	0	0	0	0	0	0	0	0	1	0	2	0	2	2	2	2	2	2	2	2	2	0	2	2	2	2	12	6	4	6	28	.	7	7	7	7
711	0	1	70	1	6	1	1	0	2	1	0	0	1	0	0	0	0	0	0	0	0	2	0	2	2	0	2	0	0	2	1	2	2	0	2	2	0	0	2	2	9	2	6	19	4	5	6	4	7
712	0	1	80	1	5	0	0	0	1	2	0	0	0	0	1	0	0	0	0	0	1	7	1	0	0	0	2	0	0	0	2	2	0	0	2	0	0	0	0	0	8	0	0	8	5	3	3	3	3
713	1	0	69	2	6	1	0	0	2	1	0	0	0	0	1	0	0	0	0	0	0	2	1	1	1	1	1	1	0	0	1	2	1	1	1	1	0	0	0	3	6	2	1	12	4	2	2	2	3
714	1	0	67	4	7	2	1	0	2	1	0	0	0	0	0	0	1	0	0	0	0	5	3	2	0	2	2	2	2	0	0	2	2	2	0	2	2	2	1	12	4	4	3	23	5	5	6	5	4
715	0	1	85	1	5	2	1	0	2	1	0	0	1	0	0	0	0	0	0	0	0	4	1	2	2	2	2	2	2	2	2	2	2	2	2	2	2	2	2	12	10	4	6	32	5	6	6	6	5
716	1	0	66	4	2	0	0	0	1	1	0	0	0	0	1	0	0	0	0	0	0	5	1	0	1	2	2	2	2	0	2	2	2	2	2	2	2	2	0	10	9	4	2	25	7	6	7	2	2
717	0	1	71	2	2	3	1	0	2	1	0	0	0	0	1	0	0	0	0	0	0	4	2	0	1	2	2	2	2	1	1	2	0	2	2	2	2	1	0	9	8	4	1	22	5	5	4	4	5
718	1	0	87	2	4	1	1	0	1	2	0	0	0	0	1	1	0	0	0	0	0	3	0	2	1	1	2	0	2	2	1	2	2	2	2	2	0	0	2	5	8	4	6	23	7	7	7	7	7
719	0	1	79	1	5	1	1	0	2	7	0	0	1	1	1	1	1	1	0	0	1	7	5	2	2	2	2	2	2	2	2	1	2	2	1	2	2	2	2	12	8	4	6	30	7	6	7	7	7
720	0	1	86	1	7	1	1	0	2	1	0	0	0	0	1	0	0	0	0	0	0	1	2	1	1	2	2	2	2	1	2	2	1	1	1	2	1	2	2	10	8	3	4	25	5	6	6	7	7
721	0	1	83	1	4	1	1	0	2	2	0	0	1	0	1	0	0	0	0	0	0	1	1	2	1	1	0	0	0	0	1	0	1	0	1	2	0	0	1	3	3	2	2	10	4	5	5	3	5
722	1	0	74	4	6	7	1	1	2	1	0	0	1	0	0	0	0	0	0	0	0	3	1	2	1	0	2	0	0	0	1	2	2	1	2	0	0	0	0	2	8	1	2	13	5	4	3	4	4
723	0	1	83	2	4	1	1	0	2	0	0	0	0	0	0	0	0	0	0	0	0	2	3	0	2	2	2	2	1	0	2	2	1	2	2	0	1	1	1	7	10	2	2	21	4	5	4	4	4
724	0	1	90	1	6	0	0	0	1	5	0	0	1	1	1	0	1	0	0	0	1	3	3	2	2	2	2	2	2	2	2	2	1	2	2	2	1	2	2	11	10	4	5	30	6	6	5	6	7
725	1	0	56	2	5	2	1	0	2	2	0	0	0	0	1	0	0	0	0	1	0	7	2	2	2	2	2	2	2	2	1	2	2	2	2	2	2	2	2	12	9	4	6	31	6	4	6	7	7
726	1	0	76	2	5	1	0	0	2	1	0	0	0	0	1	0	0	0	0	0	0	5	2	2	0	1	2	0	1	1	2	1	2	2	2	0	1	1	1	6	7	2	4	19	5	5	5	5	5
727	0	1	82	2	6	2	1	0	1	1	0	0	0	0	1	0	0	0	0	0	0	7	2	0	2	2	2	2	2	0	2	2	1	2	2	2	2	2	2	10	10	4	3	27	7	7	7	7	7
728	1	0	79	1	5	0	0	0	2	1	0	0	0	0	1	0	0	0	0	0	0	5	3	1	0	2	0	2	2	1	1	1	0	2	0	2	1	2	1	10	2	4	2	18	5	5	6	4	5
729	0	1	73	1	4	1	1	0	3	3	0	0	0	1	1	0	1	0	0	0	0	5	3	2	2	2	0	2	2	2	2	1	2	0	2	1	2	2	2	12	7	1	6	26	7	6	7	5	4
730	1	0	81	1	6	1	1	0	1	1	0	0	0	0	1	0	0	0	0	0	0	3	2	1	1	1	1	0	2	2	1	1	1	2	0	2	1	1	1	6	4	4	4	18	1	5	3	5	5
731	1	0	75	1	3	1	1	0	2	1	0	0	0	0	1	0	0	0	0	0	0	4	0	2	2	1	0	1	1	2	1	1	2	1	0	2	2	1	2	8	4	3	6	21	5	6	5	5	6
732	0	1	84	1	7	3	0	0	1	1	0	0	1	0	0	0	0	0	0	0	0	4	0	2	0	2	1	0	2	2	2	2	2	2	1	2	0	2	2	8	6	4	6	24	7	5	7	7	7
801	0	1	79	2	4	0	0	0	2	1	0	0	0	1	0	0	0	0	0	0	0	3	0	0	2	2	.	2	1	1	2	2	0	2	2	0	2	1	0	8	.	2	1	.	5	5	5	5	6
802	0	1	77	1	7	0	0	0	3	5	1	0	1	1	1	0	0	1	0	0	0	5	2	2	2	2	1	2	2	1	2	2	2	2	0	2	2	2	2	12	7	4	5	28	7	7	7	6	7
803	0	1	84	1	6	1	0	0	2	1	0	0	0	0	1	0	0	0	0	0	0	3	2	1	2	2	2	1	1	1	2	2	1	2	2	2	0	1	2	6	10	4	4	24	6	6	6	6	7
804	1	0	79	1	5	1	1	0	2	3	1	0	0	0	1	1	0	0	0	0	0	20	3	2	2	2	2	2	2	1	2	2	2	2	0	2	1	2	2	11	8	4	5	28	6	6	5	5	5
805	0	1	86	1	6	1	0	0	2	3	0	0	0	1	1	0	1	0	0	0	0	3	3	2	1	2	1	2	2	2	1	2	2	2	2	1	1	1	2	10	7	3	6	26	5	5	4	5	5
806	1	0	65	2	5	2	1	0	1	2	0	0	0	0	1	0	1	0	0	0	0	5	3	1	2	2	2	2	2	2	2	2	2	2	2	2	2	2	2	11	10	4	6	31	7	7	6	6	6
807	1	0	77	1	6	1	1	0	2	2	0	0	0	1	1	0	0	0	0	0	0	7	3	2	2	2	2	2	2	2	2	2	1	2	2	2	2	2	2	12	10	4	5	31	5	6	5	5	6
808	1	0	86	3	5	0	0	0	2	2	0	0	1	0	0	0	1	0	0	0	0	30	1	2	2	2	2	2	2	2	2	2	1	1	2	2	0	2	1	10	10	3	4	27	7	5	5	5	7
810	1	0	81	5	7	2	1	0	2	2	0	1	0	0	1	0	0	0	0	0	0	6	1	0	1	1	2	2	1	1	0	1	1	1	2	1	1	1	1	6	6	2	3	17	6	4	6	4	6
811	0	1	78	1	7	1	1	0	2	3	0	0	1	0	1	0	0	0	0	0	1	15	1	2	2	2	1	1	1	2	1	2	2	2	2	2	1	1	1	8	8	4	5	25	6	6	6	4	5
812	1	0	78	2	6	1	1	0	2	1	0	0	0	0	1	0	0	0	0	0	0	1	2	1	1	1	2	2	1	1	1	2	1	1	2	0	1	1	1	7	8	1	3	19	4	5	4	3	5
813	1	0	80	5	5	0	0	0	2	0	0	0	0	0	0	0	0	0	0	0	0	3	2	1	0	0	2	0	0	2	1	0	2	1	0	2	2	2	2	5	3	3	6	17	5	5	5	5	6
814	0	1	88	2	4	4	1	1	2	3	0	0	1	1	0	0	1	0	0	0	0	3	1	2	0	2	2	0	0	0	1	0	0	2	2	1	2	2	1	8	5	3	1	17	5	5	6	4	5
815	0	1	82	2	7	0	0	0	1	1	0	0	0	0	1	0	0	0	0	0	0	7	1	1	2	2	2	2	2	1	2	2	2	2	2	2	2	2	2	11	10	4	5	30	7	5	6	6	7
816	0	1	84	1	6	0	0	0	2	3	0	0	1	0	1	0	1	0	0	0	0	3	1	2	1	2	1	2	1	2	2	1	1	1	1	1	1	1	2	9	6	2	5	22	5	4	5	5	5
817	0	1	90	1	6	0	0	0	1	1	0	0	1	0	0	0	0	0	0	0	0	2	2	2	1	0	2	0	0	0	1	0	0	1	2	0	0	1	0	3	6	1	0	10	5	5	3	5	4
818	0	1	80	1	6	0	0	0	2	3	0	0	0	1	1	0	1	0	0	0	0	7	2	2	0	2	2	2	1	2	2	2	2	1	2	2	1	1	2	9	8	3	6	26	5	6	6	5	5
820	1	0	67	2	4	1	1	0	1	1	0	0	0	0	1	0	0	0	0	0	0	2	2	2	2	0	2	1	1	0	1	1	2	2	2	2	1	2	2	7	8	4	4	23	4	5	4	4	4
821	0	1	83	4	6	0	0	0	1	3	0	0	1	1	0	0	1	0	0	0	0	5	1	2	0	2	2	2	2	2	2	2	2	2	2	2	2	2	2	12	8	4	6	30	7	7	7	7	7
822	0	1	75	1	5	1	0	0	2	1	0	0	0	0	1	0	0	0	0	0	0	10	3	0	2	2	2	2	2	1	2	2	2	2	1	2	1	2	2	9	9	4	5	27	7	7	5	5	5
824	1	0	76	2	4	1	1	0	2	1	0	0	0	0	1	0	0	0	0	0	0	6	1	1	1	1	1	1	1	1	2	0	1	2	0	1	1	1	1	6	4	3	3	16	7	4	4	5	7
825	0	1	83	1	7	0	0	0	2	3	0	0	0	1	0	0	1	1	0	0	0	3	1	2	2	2	0	2	1	1	1	1	2	1	2	1	1	1	1	9	6	2	4	21	6	6	7	6	7
901	0	1	88	1	.	0	0	0	3	5	0	0	1	1	0	1	1	1	0	0	0	5	2	2	2	2	2	2	2	2	0	2	0	0	2	2	2	0	0	10	8	2	2	22	4	7	7	7	7
902	1	0	81	2	7	2	0	1	2	1	0	0	0	0	1	0	0	0	0	0	0	2	2	2	2	2	2	2	1	1	1	1	2	2	1	1	1	1	1	9	7	3	4	23	4	5	4	4	5
903	1	0	69	2	4	1	1	0	2	1	0	0	0	0	1	0	0	0	0	0	0	2	3	0	2	1	2	1	2	2	2	2	1	2	2	2	2	1	1	7	10	4	4	25	5	5	5	5	5
904	0	1	83	1	5	4	0	1	1	1	0	0	0	0	1	0	0	0	0	0	0	15	1	0	2	2	0	0	0	0	2	2	0	2	2	1	0	2	0	4	8	3	0	15	4	5	6	3	6
905	0	1	65	2	4	3	1	0	2	1	0	0	0	0	1	0	0	0	0	0	0	3	2	2	2	2	2	2	1	2	2	2	2	2	2	2	2	1	2	10	10	4	6	30	5	6	6	3	5
906	1	0	78	4	5	1	1	0	2	4	0	0	0	1	1	0	1	0	0	0	1	7	2	2	2	2	2	2	2	2	2	2	2	2	2	2	2	2	2	12	10	4	6	32	6	6	6	5	6
907	0	1	79	2	5	0	0	0	2	1	0	0	0	0	1	0	0	0	0	0	0	3	3	2	2	1	2	2	2	1	2	2	1	2	0	2	1	2	1	10	8	4	3	25	6	7	7	6	7
908	1	0	87	1	7	1	1	0	2	1	0	0	0	0	1	0	0	0	0	0	0	4	3	2	2	2	2	2	1	2	1	2	2	0	1	2	1	2	1	10	8	2	5	25	6	5	5	4	6
909	0	1	74	1	6	1	1	0	1	3	0	0	1	1	1	0	0	0	0	0	0	2	0	2	2	2	1	2	2	2	1	2	2	2	2	2	1	2	2	11	8	4	6	29	7	7	5	5	5
910	0	1	85	1	5	1	0	0	1	2	0	0	0	1	1	0	0	0	0	0	0	5	3	2	2	2	2	2	2	2	2	2	2	2	2	2	2	2	2	12	10	4	6	32	4	6	5	5	6
911	0	1	77	1	4	1	0	0	2	1	0	0	1	0	0	0	0	0	0	0	0	5	1	2	0	1	0	2	1	1	2	1	1	2	1	1	1	1	1	8	4	3	3	18	2	3	2	2	6
912	0	1	73	1	4	4	1	1	3	3	0	0	1	1	1	0	0	0	0	0	0	7	1	1	1	1	2	2	2	2	0	2	2	2	2	2	0	0	0	6	7	4	4	21	6	5	5	6	5
913	0	1	67	2	4	1	0	0	1	1	0	0	0	0	0	0	1	0	0	0	0	2	2	2	0	1	0	2	2	2	2	2	2	2	2	2	2	2	2	11	6	4	6	27	3	7	7	7	7
914	0	1	86	4	7	1	0	0	3	2	0	0	1	0	1	0	0	0	0	0	0	5	2	2	2	2	2	2	2	2	2	2	2	2	2	2	2	2	2	12	10	4	6	32	5	5	5	4	5
915	1	0	63	2	2	3	1	0	3	2	0	0	0	0	1	0	1	0	0	0	0	3	2	2	2	2	1	2	1	2	0	1	1	2	1	2	1	1	1	9	5	4	4	22	6	5	6	5	7
916	1	0	75	4	5	1	1	0	2	1	0	0	0	0	1	0	0	0	0	0	0	5	0	2	1	2	0	2	2	2	1	1	1	1	0	2	1	2	2	11	3	3	5	22	6	4	4	6	6
918	1	0	76	2	4	1	1	0	3	0	0	0	0	0	0	0	0	0	0	0	0	3	0	2	0	2	2	2	2	2	2	2	1	1	2	2	2	2	2	12	8	3	5	28	5	4	4	4	4
919	1	0	71	2	7	1	1	0	3	1	0	0	0	0	1	0	0	0	0	0	0	3	2	0	1	1	0	1	1	0	0	0	0	1	0	1	0	0	0	3	1	2	0	6	4	5	4	5	5
920	1	0	63	2	3	1	1	0	2	1	0	0	0	0	1	0	0	0	0	0	0	3	1	2	0	2	2	2	2	2	2	2	2	2	0	2	2	2	1	12	6	4	5	27	5	5	4	7	6
921	1	0	50	2	3	1	1	0	2	1	0	0	0	0	1	0	0	0	0	0	0	4	1	2	1	1	2	2	2	1	1	1	2	2	1	2	2	2	2	11	6	4	5	26	6	4	5	4	.
922	0	1	80	1	7	2	1	0	2	2	0	0	1	0	1	0	0	0	0	0	0	4	3	2	2	0	0	2	2	2	2	2	2	1	2	2	0	2	2	8	8	3	6	25	6	6	5	5	5
923	0	1	83	1	6	0	0	0	2	3	0	0	1	1	1	0	0	0	0	0	0	3	1	2	1	1	2	0	0	1	1	1	0	0	2	0	0	0	2	3	7	0	3	13	3	4	5	4	4
11001	0	1	92	1	6	1	0	0	2	1	0	0	1	0	0	0	0	0	0	0	0	5	1	2	2	2	2	0	0	2	0	2	2	0	2	0	0	2	0	6	8	0	4	18	5	5	6	3	4
11002	1	0	86	2	4	2	1	0	2	1	0	0	0	0	1	0	0	0	0	0	0	2	1	0	2	0	2	2	2	0	2	2	0	2	2	2	0	0	0	4	10	4	0	18	5	6	5	1	7
12002	0	1	80	1	6	1	0	0	1	1	0	0	0	0	1	0	0	0	0	0	0	3	0	1	1	1	2	0	2	1	1	0	2	1	1	0	1	0	0	5	5	1	3	14	5	5	5	5	5
12003	1	0	79	2	6	1	1	0	2	1	0	0	0	0	0	0	1	0	0	0	0	3	1	2	2	2	2	2	2	1	2	2	2	1	2	2	2	2	2	12	10	3	5	30	5	5	6	6	6
12005	1	0	78	5	7	2	1	0	2	1	0	0	0	0	1	0	0	0	0	0	0	4	3	2	2	2	2	2	2	0	2	2	1	1	2	2	2	1	2	11	10	3	3	27	5	5	5	5	5
12006	0	1	82	5	5	0	0	0	3	0	0	0	0	0	0	0	0	0	0	0	0	0	0	1	0	1	1	2	1	1	1	0	1	2	1	1	1	1	1	7	3	3	3	16	6	5	7	5	5
[truncated: 21 more columns]
